# Supplementary material for: Evidence of off-target probe binding affecting 10x Genomics Xenium gene panels compromise accuracy of spatial transcriptomic profiling
Source: eLife. 2026 May 1;14:RP107070. doi: 10.7554/eLife.107070 (PMC13134852; doi:10.7554/eLife.107070)
Supplement: Supplementary file 2. — This table shows the 14 genes whose probes in the 10x Genomics Xenium v1 Human Breast Gene Expression Panel exhibit predicted off-target probe binding, where each off-target alignment involves a perfect 40 bp match to the probe target sequence. The final column shows the gene types, in order, of each of the off-target genes shown in column 3. Off-target alignments between CCPG1 probes and DNAAF1-CCPG1 were excluded. Abbreviations: PC = protein-coding; PG = pseudogene; precursor_RNA = precursor RNA; misc_RNA = miscellaneous RNA; ncRNA = non-coding RNA. [file elife-107070-supp2.xlsx]

## Sheet: Sheet1
Target gene	Number of probes	Predicted binding genes	Number of additional probes aligned	Gene types – GENCODE (v47)
ACSM2A	8	ACSM2A,ACSM2B	6,4	PC,PC
ACSM2B	8	ACSM2B,ACSM2A	8,4	PC,PC
ATRNL1	8	ATRNL1,ENSG00000285582	7,1	PC,lncRNA
CD68	7	CD68,ENSG00000264772	7,6	PC,lncRNA
CEACAM1	8	CEACAM1,CEACAM3,CEACAM8,CEACAM5	8,1,1,1	PC,PC,PC,PC
CFH	8	CFH,ENSG00000289697	7,7	PC,PC
CP	8	CP,CPP	8,3	PC,PG
CSPG4	8	CSPG4,CSPG4P11,ENSG00000290690,ENSG00000291211,CSPG4P12,CSPG4P13,CSPG4P10,CSPG4P5,ENSG00000290947,ENSG00000290664,CSPG4P4Y,CSPG4P3Y	8,2,2,1,2,5,2,2,1,1,1,1	PC,PG,lncRNA,lncRNA,PG,PG,PG,PG,lncRNA,lncRNA,PG,PG
CUBN	8	CUBN,CUBNP2	8,1	PC,PG
CYP2F1	8	CYP2F1,ENSG00000293114,CYP2F2P	6,2,3	PC,lncRNA,PG
EPCAM	8	EPCAM,ENSG00000225356	6,1	PC,PG
FCGR3A	8	FCGR3A,FCGR3B,ENSG00000289768	8,4,1	PC,PC,PC
FCGR3B	12	FCGR3B,FCGR3A,ENSG00000289768	10,7,4	PC,PC,PC
FLT1	17	FLT1,FLT1P1	16,4	PC,PG
