# Supplementary material for: Evidence of off-target probe binding affecting 10x Genomics Xenium gene panels compromise accuracy of spatial transcriptomic profiling
Source: eLife. 2026 May 1;14:RP107070. doi: 10.7554/eLife.107070 (PMC13134852; doi:10.7554/eLife.107070)
Supplement: Supplementary file 3. — This table shows the 23 genes whose probes in the 10x Genomics Xenium v1 Human Breast Gene Expression Panel exhibit predicted off-target probe binding, where each off-target alignment involves a perfect 40 bp match to the probe target sequence. The final column shows the gene types, in order, of each of the off-target genes shown in column 3. Off-target alignments between CCPG1 probes and DNAAF1-CCPG1 were excluded. Abbreviations: PC = protein-coding; PG = pseudogene; miRNA = microRNA. [file elife-107070-supp3.xlsx]

## Sheet: Sheet1
Target gene	Number of probes	Predicted binding genes	Number of probes aligned	Gene types
ADH1B	8	ADH1B,ADH1A,ADH1C	8,2,1	PC,PC,PC
AKR1C1	9	AKR1C1,AKR1C2,AKR1C3,	8,1,1,1	PC,PC,PC,PC
		AKR1C4
APOBEC3A	10	APOBEC3A,APOBEC3B	8,2	PC,PC
APOBEC3B	8	APOBEC3B,APOBEC3D,APOBEC3F	8,2,2	PC,PC,PC
C15orf48	6	C15orf48,MIR147B	6,1	PC,miRNA
CD8B	16	CD8B,CD8B2	16,2	PC,PC
EPCAM	8	EPCAM,LOC132386	8,1	PC,PG
HMGA1	7	HMGA1,HMGA1P1,HMGA1P2,	7,1,3,2,2	PC,PG,PG,PG,
		HMGA1P3,HMGA1P6		PG
KRT14	6	KRT14,KRT16P6	6,1	PC,PG
KRT8	16	KRT8,KRT8P33,KRT8P32,KRT8P22,	8,2,1,1,3,	PC,PG,PG,PG,
		KRT8P3,KRT8P42,KRT8P45,KRT8P17,	1,2,1,1,2,	PG,PG,PG,PG,
		KRT8P11,KRT8P2,KRT8P36,KRT8P37,	1,1,1	PG,PG,PG,PG,
		KRT8P30		PG
MYLK	11	MYLK,MYLKP1	11,1	PC,PG
MYO5B	8	MYO5B,MYO5BP1,MYO5BP2,	8,1,1,1	PC,PG,PG,PG
		LOC102724787
POLR2J3	12	SPDYE2,SPDYE7P,SPDYE21,SPDYE16,	1,1,1,1,	PC,PG,PC,PC,
		SPDYE5,SPDYE18,SPDYE2B,POLR2J,	1,1,1,3,	PC,PC,PC,PC,
		POLR2J3,POLR2J2-UPK3BL1,POLR2J2,	5,2,3,4,3,2	PC,PC,lncRNA,
		POLR2J3-UPK3BL2,POLR2J4		lncRNA,PG
SCD	8	SCD,SCDP1	8,2	PC,PG
SERHL2	8	SERHL2,SERHL	8,7	PC,PG
SMS	8	SMS,LOC646347,LOC100419037,	8,3,1,1	PC,PG,PG,PG
		LOC642590
TOMM7	10	TOMM7,LOC107986346	3,2	PC,PC
TPD52	8	TPD52,TPD52-MRPS28	8,5	PC,PC
TPSAB1	2	TPSAB1,TPSB2,TPSD1	2,2,1	PC,PC,PC
TRAF4	9	TRAF4,LOC100420513	9,1	PC,PG
TUBB2B	8	TUBB2B,TUBB2BP1	8,1	PC,PG
VOPP1	11	VOPP1,LOC729086	10,8	PC,PG
VWF	11	VWF,VWFP1	8,1	PC,PG
