# Supplementary material for: Evidence of off-target probe binding affecting 10x Genomics Xenium gene panels compromise accuracy of spatial transcriptomic profiling
Source: eLife. 2026 May 1;14:RP107070. doi: 10.7554/eLife.107070 (PMC13134852; doi:10.7554/eLife.107070)
Supplement: Supplementary file 4. — Off-target alignments between CCPG1 probes and DNAAF1-CCPG1 were excluded. [file elife-107070-supp4.xlsx]

## Sheet: Sheet1
Perfect match		GENCODE Basic	GENCODE Comprehensive	RefSeq	CHESS
Number of transcripts		158339	387944	181627	158363
All genes	Off-target probes	128	126	44	73
	Affected genes	37	38	14	23
Pseudogenes removed	Off-target probes	101	107	44	35
	Affected genes	29	29	15	11
Protein-coding genes only	Off-target probes	26	28	26	26
	Affected genes	11	11	10	9
