# Supplementary material for: Evidence of off-target probe binding affecting 10x Genomics Xenium gene panels compromise accuracy of spatial transcriptomic profiling
Source: eLife. 2026 May 1;14:RP107070. doi: 10.7554/eLife.107070 (PMC13134852; doi:10.7554/eLife.107070)
Supplement: Supplementary file 5. [file elife-107070-supp5.xlsx]

## Sheet: Sheet1
Gene	GENCODE	RefSeq	CHESS
ADH1B	✓	✓	✓
AKR1C1	✓	✓	✓
APOBEC3A	✓	✓	✓
APOBEC3B	✓	✓	✓
CD8B	✓	✓	✓
POLR2J3	✓	✓	✓
TPSAB1	✓	✓	✓
AQP1	✓	𝗑	𝗑
C1QA	✓	𝗑	𝗑
CD79B	✓	𝗑	𝗑
CEACAM6	✓	𝗑	𝗑
S100A4	𝗑	✓	𝗑
TOMM7	𝗑	✓	✓
TPD52	𝗑	✓	✓
