# Supplementary material for: Evidence of off-target probe binding affecting 10x Genomics Xenium gene panels compromise accuracy of spatial transcriptomic profiling
Source: eLife. 2026 May 1;14:RP107070. doi: 10.7554/eLife.107070 (PMC13134852; doi:10.7554/eLife.107070)
Supplement: Supplementary file 6. — Abbreviations: PC = protein-coding; PG = pseudogene; lncRNA = long non-coding RNA. [file elife-107070-supp6.xlsx]

## Sheet: Sheet1
Target	Number of probes	Predicted binding genes	Number of probes aligned	Gene types – GENCODE (v47)
gene
ACTG2	14	ACTG2,POTEE,ACTB,POTEJ,ACTBP16,	14,1,1,1,	PC,PC,PC,PC,PG,PC,PC,PC,PG,PG,
		ACTA1,POTEI,POTEM,ACTG1P14,	1,1,1,	PC,PG,PG,PG,PG,
		ACTG1P12,POTEF,POTEKP,ACTBP15,	1,1,	PG,PG,PG
		ENSG00000241838,ACTG1P15,	1,1,1,
		ENSG00000230080,ACTBP1,ACTG1P19	1,1,
			1,1,1,1
APOC1	2	APOC1,APOC1P1	2,1	PC, PG
CD83	8	CD83,CD83P1	8,2	PC,PG
CEACAM8	13	CEACAM8,CEACAMP5,LIPE-AS1,	8,1,1,1	PC,PG,lncRNA,PG
		CEACAMP8
ENAH	8	ENAH,ENAHP1	8,3	PC,PG
FBLIM1	9	FBLIM1,FBLIM1P1	9,1	PC,PG
FCGR3A	8	FCGR3A,FCGR3B,ENSG00000289768	8.4.1	PC,PC,PC
FLNB	14	FLNB, ENSG00000263343	14,1	PC,PG
KLRC1	8	KLRC1,KLRC2,KLRC3,KLRC4,	8,1,1,1,1,1	PC,PC,PC,PC,PC,
		ENSG00000255641,KLRC4-KLRK1		PC
KRT16	5	KRT16,ENSG00000290978 ,KRT16P3,	5,2,2,1,1	PC,lncRNA,
		KRT16P2,ENSG00000290657		lncRNA,PG,
				lncRNA
KRT6B	8	KRT6B,KRT6C	8,1	PC,PC
KRT7	5	KRT7,KRT75,KRT8,KRT8P26,KRT8P20,KRT8P13,KRT8P7,KRT8P12,KRT8P3,KRT5,	5,1,1,1,1,1,1,	PC,PC,PC,PG,PG,
		KRT8P21,KRT8P51,KRT79,KRT8P14	1,1,1,1,1,1,1,	PG,PG,PG,PG,PC,
		,KRT8P33,KRT8P35,KRT8P17,	1,1,1,1,1,1,1,	PG,PG,PC,PG,PG,
		KRT6C,KRT8P18,KRT8P10,KRT8P11,	1,1,1,1,1,1,1,1,1,1	PG,PG,PC,PG,PG,
		KRT8P50,KRT8P25,KRT8P32,KRT6B,		PG,PG,PG,PG,PC,
		KRT8P36,KRT126P,ENSG00000293192,		PG,PG,lncRNA,
		KRT8P46,KRT8P39,KRT8P49		PG,PG,PG
OCIAD2	8	OCIAD2,ENSG00000253760,	8,1,1	PC,PG,lncRNA
		ENSG00000294977
REXO4	8	REXO4,ENSG00000259696	8,1	PC,PG
SCGB2A1	6	SCGB2A1,SCGB2A2	6,1	PC,PC
SVIL	8	SVIL,SVIL2P,ENSG00000290952	8,1,1	PC,PG,lncRNA
ZEB2	21	ZEB2,ENSG00000254198	21,1	PC,PG
ZNF562	10	ZNF562,ENSG00000291231,ZNF561,	10,1,	PC,lncRNA,PC,PG,
		ZNF812P,ENSG00000226810,	1,1,	PG,PG
		ENSG00000267490	1,1
