# Supplementary material for: Evidence of off-target probe binding affecting 10x Genomics Xenium gene panels compromise accuracy of spatial transcriptomic profiling
Source: eLife. 2026 May 1;14:RP107070. doi: 10.7554/eLife.107070 (PMC13134852; doi:10.7554/eLife.107070)
Supplement: Supplementary file 7. — This effect is observed either through the accumulation of new probes with predicted off-target binding or via the identification of additional predicted off-target genes per probe. Abbreviations: PC = protein-coding; PG = pseudogene; lncRNA = long non-coding RNA. [file elife-107070-supp7.xlsx]

## Sheet: Sheet1
Target gene	Number of probes	Predicted binding genes	Number of additional probes aligned	Gene types – GENCODE (v47)
AKR1C1	9	AKR1C6P	1	PG
APOBEC3A	10	APOBEC3G	1	PC
CEACAM6	8	CEACAM1,CEACAM8	1,1	PC,PC
HMGA1	7	HMGA1P6	2	PG
KRT14	6	ENSG00000290978,KRT16,KRT16P2	1,1,1	lncRNA,PC,PG
KRT8	16	KRT8P8,KRT8P9,KRT8P44,KRT8P31,	1,1,1,1,1,	PG,PG,PG,PG,
		KRT8P46,KRT8P48,KRT8P6,	1,2,1,1,1,	PG,PG,PG,PG,
		ENSG00000235286,KRT8P43,KRT8P47,	1,1,1,1,1,2,1,2,1,2,2,2,1,1,2,2,2,2,1,1,1	PG,PG,PG,PG,
		KRT8P13,KRT8P14,KRT8P50,KRT8P5,		PG,PG,PG,PG,
		KRT8P35,KRT8P7,KRT8P15,KRT8P1,		PG,PG,PG,PC,
		KRT8P19,GFAP,KRT80,KRT8P41,		PC,PG,PG,PG,
		KRT8P34,KRT90P,KRT8P4,KRT8P49,		PG,PG,PG,
		KRT8P40,ENSG00000293192,KRT8P12,		lncRNA,PG,PG
		KRT8P21
LDHB	8	LDHBP1,LDHBP2	2,4	PG,PG
MYO5B	8	MYO5BP3	2	PG
SMS	8	ENSG00000251342	2	PG
TUBB2B	8	TUBB2A	1	PC
