# Supplementary material for: Evidence of off-target probe binding affecting 10x Genomics Xenium gene panels compromise accuracy of spatial transcriptomic profiling
Source: eLife. 2026 May 1;14:RP107070. doi: 10.7554/eLife.107070 (PMC13134852; doi:10.7554/eLife.107070)
Supplement: Supplementary file 8. — The final column lists the gene types, in order, corresponding to the off-target genes shown in column 3. Abbreviations: PC = protein-coding; PG = pseudogene; precursor_RNA = precursor RNA; misc_RNA = miscellaneous RNA; ncRNA = non-coding RNA. [file elife-107070-supp8.xlsx]

## Sheet: Sheet1
Target gene	Number of probes	Predicted binding genes	Number of additional probes aligned	Gene types – GENCODE (v47)
ANG	8	ANG,RNASE4,ENSG00000259171	8,1,1	PC,PC,PC
AOC3	8	AOC3,AOC4P	8,3	PC,PG
CCL3	6	CCL3, CCL3L3	6,2	PC,PG
CCNB2	8	CCNB2,CCNB2P1	7,1	PC,PG
CD209	11	CD209,ENSG00000288669,CLEC4M	10,2,2	PC,PC,PC
CD24	12	CD24,CD24P4	12,2	PC,PG
CD68	9	CD68,ENSG00000264772	9,8	PC,lncRNA
CLEC4M	9	CLEC4M,CD209	9,2	PC,PC
CSH1	5	CSH1,CSHL1,CSH2	5,2,5	PC,PC,PC
CSH2	8	CSH2,CSH1,GH2,GH1,ENSG00000285947,CSHL1	8,8,2,2,2,3	PC,PC,PC,PC,PC,PC
CSHL1	9	CSHL1,CSH1,CSH2,GH2,ENSG00000285947,GH1	9,3,3,2,1,2	PC,PC,PC,PC,PC,PC
CSPG4	8	CSPG4,ENSG00000290664,CSPG4P13,CSPG4P5,CSPG4P10,CSPG4P11,ENSG00000290947,ENSG00000290690,CSPG4P12,ENSG00000291211,CSPG4P4Y,CSPG4P3Y	8,1,5,2,2,2,1,2,2,1,1,1	PC,lncRNA,PG,PG,PG,PG,lncRNA,lncRNA,PG,lncRNA,PG,PG
CYP26A1	8	CYP26A1,ENSG00000285846	5,5	PC,lncRNA
EPCAM	8	EPCAM,ENSG00000225356	5,1	PC,PG
ERVFRD-1	8	ERVFRD-1,ENSG00000258619	8,1	PC,PG
ERVV-1	8	ERVV-1,ERVV-2	8,5	PC,PC
ERVV-2	8	ERVV-2,ERVV-1	8,1	PC,PC
ERVW-1	8	ERVW-1,RBM41	8,4	PC,PC
FCGR2B	8	FCGR2B,FCGR2A,ENSG00000289273,FCGR2C	7,2,1,3	PC,PC,PG,PC
FCGR3A	8	FCGR3A,FCGR3B,ENSG00000289768	8,4,1	PC,PC,PG
FLT1	11	FLT1,FLT1P1	10,2	PC,PG
HLA-A	8	HLA-H,HLA-A,HLA-L,HLA-B,HLA-J,HLA-C,ENSG00000290574,HLA-G,HLA-W,HLA-E	7,3,1,1,1,1,1,1,1,1	PC,PG,PG,PC,PG,PC,lncRNA,PC,PG,PC
HLA-C	8	HLA-C,HLA-B,HLA-L,HLA-J,HLA-H,HLA-A,ENSG00000290574	8,2,1,1,1,1,1	PC,PC,PG,PG,PG,PC,lncRNA
HLA-G	8	HLA-G,HLA-E	7,1	PC,PC
IFI27	5	IFI27,IFI27L1,IFI27L2	5,1,1	PC,PC,PC
IL6ST	10	IL6ST,IL6STP1,ENSG00000305843	10,2,1	PC,PG,lncRNA
IRF6	8	IRF6,ENSG00000289700	8,8	PC,PC
JAG2	8	JAG2,ENSG00000257622	8,3	PC,lncRNA
KIR2DL1	8	KIR2DL1,KIR2DP1,KIR3DL1,KIR2DL3	7,1,1,2	PC,PG,PC,PC
KLRC1	8	KLRC1,KLRC2,KLRC4,KLRC3,ENSG00000255641,KLRC4-KLRK1	8,1,1,1,1,1	PC,PC,PC,PC,PC,PC
KRT7	7	KRT7,KRT8P25,KRT8P14,KRT8P7,KRT6C,KRT8P50,KRT8,KRT8P39,KRT8P3,KRT75,KRT8P20,KRT8P18,KRT8P21,KRT126P,KRT8P12,KRT8P10,KRT8P32,KRT5,KRT8P33,ENSG00000293192,KRT8P13,KRT8P49,KRT8P26,KRT8P35,KRT6B,KRT8P51,KRT8P36,KRT79,KRT8P17,KRT8P11,KRT8P46,KRT8P1,KRT8P9,KRT8P31,KRT8P5,KRT8P41,KRT8P45,KRT8P23,KRT8P47,KRT8P43,KRT78,KRT6A,KRT3,KRT8P24,KRT8P22,KRT7-AS	3,1,2,1,1,1,2,1,2,2,2,2,1,1,2,1,2,1,2,2,1,2,1,2,1,1,2,2,2,1,1,1,1,1,1,1,1,1,1,1,1,1,1,1,1,1
KRT8	10	KRT8,ENSG00000293192,KRT8P21,KRT8P12,KRT8P32,KRT8P48,KRT8P36,KRT8P3,ENSG00000235286,KRT8P19,KRT8P47,KRT8P1,KRT8P11,KRT8P31,KRT8P7,KRT8P2,KRT8P35,KRT8P13,KRT8P22,KRT8P15,KRT8P17,KRT8P43,KRT8P14,KRT8P42,KRT8P50,KRT8P6,KRT8P5,KRT8P9,KRT8P45	10,1,1,1,3,1,2,3,2,1,2,1,2,1,1,1,1,2,2,1,1,1,1,1,1,1,1,1,1	PC,lncRNA,PG,PG,PG,PG,PG,PG,PG,PG,PG,PG,PG,PG,PG,PG,PG,PG,PG,PG,PG,PG,PG,PG,PG,PG,PG,PG,PG,PG
LAIR2	6	LAIR2,CDH23	5,1	PC,PC
LGALS9	8	LGALS9,ENSG00000266728,LGALS9DP,LGALS9B,LGALS9C	7,3,3,2,2	PC,PC,PG,PC,PC
NOS2	8	NOS2,NOS2P2,ENSG00000297633,NOS2P3,NOS2P1	8,1,1,1,1	PC,PG,lncRNA,PG,PG
PAGE4	6	PAGE4,ENSG00000235349,XAGE3,ENSG00000290520,ENSG00000169164	6,1,1,1,1	PC,PG,PC,lncRNA,PG
PCNA	8	PCNA,PCNAP3	8,2	PC,PG
PLAC8	11	PLAC8,ENSG00000256804	11,1	PC,PG
PPBP	8	PPBP,ENSG00000288796	8,4	PC,PC
PRG2	4	PRG2,ENSG00000254979	4,1	PC,PC
PSG1	8	PSG1,PSG10P,PSG5,PSG2,ENSG00000291235,PSG6,PSG7,PSG11,PSG4,PSG8,PSG3,PSG9	8,4,3,3,4,2,3,5,2,3,4,1	PC,PG,PC,PC,lncRNA,PC,PC,PC,PC,PC,PC,PC
PSG2	8	PSG2,PSG9,PSG5,PSG8,PSG4,PSG6,PSG3,PSG1,PSG7,PSG10P,PSG11,ENSG00000291235	8,3,4,5,2,2,4,4,3,2,3,1	PC,PC,PC,PC,PC,PC,PC,PC,PC,PG,PC,lncRNA
RPS4Y1	8	RPS4Y1,XGY2,ENSG00000213318	8,3,1	PC,PG,PG
SLC25A15	8	SLC25A15,SLC25A15P3,ENSG00000299646	7,1,1	PC,PG,lncRNA
SOX7	8	SOX7,PINX1	8,4	PC,PC
TEAD4	8	TEAD4,TEAD3	5,1	PC,PC
TPSAB1	8	TPSAB1,TPSB2,TPSD1	7,6,3	PC,PC,PC
VWF	8	VWF,VWFP1	8,1	PC,PG
XIST	15	XIST,LNX2BP	15,3	lncRNA,PG
