# Supplementary material for: Evidence of off-target probe binding affecting 10x Genomics Xenium gene panels compromise accuracy of spatial transcriptomic profiling
Source: eLife. 2026 May 1;14:RP107070. doi: 10.7554/eLife.107070 (PMC13134852; doi:10.7554/eLife.107070)
Supplement: Supplementary file 9. — The final column lists the gene types, in order, corresponding to the off-target genes shown in column 3. Abbreviations: PC = protein-coding; PG = pseudogene; precursor_RNA = precursor RNA; misc_RNA = miscellaneous RNA; ncRNA = non-coding RNA. [file elife-107070-supp9.xlsx]

## Sheet: Sheet1
Target gene	Number of probes	Predicted binding genes	Number of additional probes aligned	Gene types – GENCODE (v47)
ACSM2A	8	ACSM2A,ACSM2B	6,4	PC,PC
ACSM2B	8	ACSM2B,ACSM2A	8,4	PC,PC
ATRNL1	8	ATRNL1,ENSG00000285582	7,1	PC,lncRNA
CD68	7	CD68,ENSG00000264772	7,6	PC,lncRNA
CEACAM1	8	CEACAM1,CEACAM3,CEACAM8,CEACAM5	8,1,1,1	PC,PC,PC,PC
CFH	8	CFH,ENSG00000289697	7,7	PC,PC
CP	8	CP,CPP	8,3	PC,PG
CSPG4	8	CSPG4,CSPG4P11,ENSG00000290690,ENSG00000291211,CSPG4P12,CSPG4P13,CSPG4P10,CSPG4P5,ENSG00000290947,ENSG00000290664,CSPG4P4Y,CSPG4P3Y	8,2,2,1,2,5,2,2,1,1,1,1	PC,PG,lncRNA,lncRNA,PG,PG,PG,PG,lncRNA,lncRNA,PG,PG
CUBN	8	CUBN,CUBNP2	8,1	PC,PG
CYP2F1	8	CYP2F1,ENSG00000293114,CYP2F2P	6,2,3	PC,lncRNA,PG
EPCAM	8	EPCAM,ENSG00000225356	6,1	PC,PG
FCGR3A	8	FCGR3A,FCGR3B,ENSG00000289768	8,4,1	PC,PC,PC
FCGR3B	12	FCGR3B,FCGR3A,ENSG00000289768	10,7,4	PC,PC,PC
FLT1	17	FLT1,FLT1P1	16,4	PC,PG
HLA-DQA1	8	HLA-DQA1,HLA-DQA2	7,2	PC,PC
LDB3	13	LDB3,ENSG00000289258	11,7	PC,PC
PARP8	15	PARP8,LINC00869,LINC01138,LINC00623,ENSG00000290569,ENSG00000223804,LINC01145,ENSG00000274265,ENSG00000284964,ENSG00000285062	14,2,2,2,2,2,2,2,1,1	PC,lncRNA,lncRNA,lncRNA,lncRNA,PG,lncRNA,lncRNA,PG,PG
PLD5	8	PLD5,ENSG00000226113,PLD5P1	8,2,2	PC,PG,PC
REG1A	8	REG1A,ENSG00000290771,REG1CP,REG1B	7,2,2,1	PC,lncRNA,PG,PC
SERPINB3	8	SERPINB3,SERPINB4	8,3	PC,PC
SLAMF1	11	SLAMF1,ENSG00000228863	10,1	PC,lncRNA
SVIL	8	SVIL,ENSG00000290952,SVIL2P	8,1,1	PC,lncRNA,PG
TPSB2	1	TPSB2,TPSD1,TPSAB1	1,1,1	PC,PC,PC
VIM	8	VIM,ENSG00000234961	7,1	PC,lncRNA
